# Supplementary material for: Using naturally occurring climate resilient corals to construct bleaching-resistant nurseries
Source: PubMed Central journal article supplement — Proc Natl Acad Sci U S A. 2019 May 6;116(21):10586–91. doi: 10.1073/pnas.1721415116 (PMC6535031; doi:10.1073/pnas.1721415116), 2019-05-06
Supplement: pnas.1721415116.sapp.pdf [file pnas.1721415116.sapp.pdf]

## 1 **Supplementary Materials: Methods and supplements**

2

### 3 ***Selecting Colonies & Transplant site***

4

5 We selected 80 coral colonies (henceforth called parent colonies) representing four  
6 species that were identified based on morphology: *Acropora gemmifera*, *Acropora*  
7 *hyacinthus* (cryptic species HE in Ladner & Palumbi 2012 [1]), *Pocillopora damicornis*,  
8 and *Porites cylindrica*. Colonies were within the National Park of American Samoa  
9 (14° 11' S, 169° 36' W) and ten of each species were selected from the Highly Variable  
10 Pool or the HVP (Pool 300 in [2]) while the remaining ten for each species were selected  
11 from the Moderately Variable Pool or the MVP (Pool 400 in [2]). Colonies spanned an  
12 area of 0.2 square kilometers in the HVP and 0.3 square kilometers in the MVP and  
13 spread from crest to near shore at depths ranging from less than 0.3m at low tide to 2-3m.  
14 In addition to spatial distribution, colonies were selected based on size such that sampling  
15 never exceeded 10% of the colony. Colonies of *Acropora* ranged in size from 35cm to  
16 120cm diameter, colonies of *Pocillopora* ranged in size from 30cm to 80cm, and colonies  
17 of *Porites* ranged in size from 45cm to 200cm. All colonies were tagged, photographed,  
18 measured, and recorded at their latitude and longitude to the fifth decimal place. A subset  
19 of colonies (~50) had long-term temperature loggers collecting data every ten minutes to  
20 half hour.

21

22 The transplant site was selected within the proposed Sili region based on its depth (>3' at  
23 low tide) and accessibility. Since no suitable substrate was available to tie down the  
24 crates, a local construction crew helped create cement pallets to hold crates in the  
25 transplant site. Ten pallets were set up in pairs from shore to crest spanning less than 0.1  
26 square kilometer. Pallets were designed to hold one replicate of all 80 colonies with a  
27 temperature logger collecting data every ten minutes.

28

### 29 ***Creating nubbins & transplanting***

30 We cut ten small fragments (~3cm in length, all 4g±1g), hereafter nubbins, from each of  
31 the 80 parent colonies in their native environments. The nubbins were glued underwater  
32 to nylon bolts using two-part underwater epoxy. Nubbins recovered in their native  
33 environment for up to 1 week and were then redistributed so all colonies from a single  
34 species were represented on one crate (20 colonies per crate x 4 species x 10 replicates =  
35 800 nubbins across 40 crates). Each nubbin was photographed and buoyant weighed for  
36 baseline growth data.

37

38 Once the 40 crates had recovered in their native environments, crates were relocated to  
39 our selected transplant site. Crates were moved across the island in 40-gallon bins of  
40 seawater and were zip-tied down onto the ten replicate pallets at the transplant site.

41

42 We tested multi-locus-genotypes for the three species that bleached and found all parents  
43 to be different genotypes in *Acropora hyacinthus*. For *Acropora gemmifera* there were 18  
44 genets among 20 parent colonies. And for *Pocillopora damicornis*, there were 11 genets  
45 among 20 parent colonies. Parent colonies are used in analysis for three reasons: they  
46 represented wild colonies experiencing different acclimatization histories, they allowed

47 us to test the tolerance of a nursery established without genotyping, and in the case of  
48 *Pocillopora damicornis*, they represented different combinations of coral clone and  
49 dominant symbiont type.

50

### 51 ***Remote & field monitoring***

52 Photographs were taken of the transplanted corals approximately every week to assess  
53 survival, predation, and physiological responses to environment. From these photos, coral  
54 nubbins were categorized into four classes: alive (any pigmented and unwounded tissue);  
55 predated (visible wound); dead (complete algae cover over skeleton); missing (removed  
56 from crate via predation event).

57

58 Predation was most extensive on *Pocillopora damicornis* however also present in  
59 *Acropora hyacinthus*. Predation was nearly absent in *Porites cylindrica* and *Acropora*  
60 *gemmifera*, potentially due to skeletal density and size of branches. Due to the overall  
61 faster growth rate and healing of the *Acropora* species, predation had a much stronger  
62 impact on survival of *Pocillopora damicornis* than on survival of *Acropora hyacinthus*. We  
63 were unable to detect a signal of predation by predicted resilience or by genotype  
64 (ANOVA  $p > 0.05$ ) indicating an overall average impact on predation for growth rates and  
65 performance during the bleaching event.

66

67 We also included three additional field seasons (Dec 2014, April 2015, and August 2015)  
68 to measure growth via buoyant weight, assess experimental stress tolerance, and  
69 exchange temperature loggers. Data are included in Dataset S2.

70

### 71 ***Characterizing proxies of resilience***

72 Three simple environmental and physiological proxies of bleaching tolerance were  
73 measured at the nursery's establishment. One proxy was habitat of origin: the Highly  
74 Variable Pool (or the HVP) experiences more frequent heat extremes above 34°C  
75 whereas the Moderately Variable Pool (or the MVP) rarely experiences temperatures  
76 above 33°C (Figure 1a and Figure 3a) [2]. The second proxy was based on the time spent  
77 above 31°C for each parent colony, measured directly by thermo-logger or interpolated  
78 from nearby loggers over one austral summer (see *Interpolating temperature data for*  
79 *microclimate characterization*). The third proxy was derived from specific tests of heat  
80 tolerance for each colony assessing physiological response from a standard lab-induced  
81 heat stress administered by a portable tank (see *characterizing experimental stress*  
82 *performance*). The tank is inexpensive and is deployable in remote locations. In addition  
83 to these three proxies, we also assessed the symbiont clade in each colony because clade  
84 D symbionts are thought to be much more thermally tolerant than co-occurring clade C  
85 symbionts [3]. Finally we assessed biomarkers for thermal tolerance, based on genotypes  
86 at multiple loci identified as candidate heat-tolerance alleles by Bay and Palumbi 2014  
87 [4] and a single SNP marker developed by Jin et al. 2016 [5] (see *Determining*  
88 *biomarkers*).

89

### 90 ***Interpolating temperature data for microclimate characterization***

91 Temperature loggers collecting data at ten-minute intervals were placed to cover the  
92 extent of the microhabitats for parent colonies. For colonies that did not have temperature

93 loggers, temperature was interpolated using an Inverse Distance Weighting algorithm and  
94 temperature was sampled for each colony from the raster surface. For the duration of the  
95 austral summer (December 2014-April 2015), we counted each observation above 31°C  
96 (the nominal bleaching temperature for the region [4] as well as the 95<sup>th</sup> percentile of the  
97 temperature distribution) and ranked each colony within species from hottest (most time  
98 points above 31°C) to coolest. We selected time points spent above 31°C, though the  
99 integral of time above 31°C had a high correlation ( $\text{cor} = 0.99$ ,  $p < 2e-16$ ) to time spent  
100 above 31°C. Two colonies in the MVP (SU09 and SU10) did not have temperature data  
101 during the summer evaluated and were not near other loggers ( $>0.1$  km). They were  
102 excluded from the temperature analysis. Data of time spent above 31°C for each parent  
103 colony are included in Dataset S1.

104

### 105 *Characterizing experimental stress performance*

106

107 For each species, we first determined the T50 or the temperature at which 50% of the  
108 bleaching response occurred after a three-hour ramp from control temperatures (29°C) to  
109 the high temperature and a three hour hold at the high temperature. The established T50  
110 temperature for *Acropora hyacinthus* for this region is 34°C. We established the T50 for  
111 the other three species by testing four fragments at control temperatures of 29°C and two  
112 to four fragments across multiple ramps with high temperatures ranging from 33°C to  
113 37°C. The T50 temperatures were established as 34°C for *Acropora hyacinthus*, 35°C for  
114 *Acropora gemmifera* and *Pocillopora damicornis*, and 36°C for *Porites cylindrica*.

115

116 Once we established the T50, we collected eight ~3cm pieces of live coral fragment from  
117 each parent colony and placed them in our stress assay tanks. Tanks had constant flow-  
118 through at 1 ml/s, had no more than 12 fragments of coral per test, and had standardized  
119 light conditions of 700uE set on a 12-hour light/dark cycle. We kept four samples per  
120 colony at a constant 29°C as a control and exposed four samples per colony to a three-  
121 hour ramp from 29°C to the species-specific T50 followed by a three-hour hold at the  
122 species-specific T50 followed by a return to baseline 29°C. We allowed fragments to  
123 recover in tanks overnight.

124

125 All samples were assessed for visual bleaching the following morning and were placed  
126 into 95% ethanol to extract chlorophyll. Chlorophyll was measured using  
127 spectrophotometric analysis [6] and was standardized based by the surface area of each  
128 sample measured using the wax-dip method [7]. Resilience was calculated by measuring  
129 the chlorophyll retained by dividing the average chlorophyll of heat-stressed samples by  
130 the average chlorophyll of control samples.

131

132 This established our baseline experimental stress tolerance in August of 2015 (end of the  
133 austral winter) and foundation for predicted resilience from the experimental stress assay.  
134 Coral were then ranked within species from highest chlorophyll retention (most tolerant)  
135 to lowest. Data chlorophyll retained and standard deviation for each parent colony is  
136 included in Dataset S1.

137

138

### 139 **Determining unique genotypes for *Acropora* and *Pocillopora***

140 Genetic samples were collected for parent colonies, all 20 *Acropora gemmifera*, all 20  
141 *Pocillopora damicornis*, and 3 *Acropora hyacinthus* in August of 2014 or April of 2015.  
142 The remaining 17 colonies of *Acropora hyacinthus* had previously been identified and  
143 classified as unique in Bay & Palumbi 2014 and Palumbi et al. 2014. RNA libraries were  
144 created for the 43 parent colonies and were sequenced on two Illumina HiSeq lanes and  
145 subsequently mapped to de novo transcriptomes for each respective species. High quality  
146 SNPs (called in all individuals, MAF > 0.05, and overall QUAL > 30, genotype quality  
147 GQ > 20) were called using FreeBayes and 23,721 SNPs for *Acropora gemmifera* and  
148 22,481 SNPs for *Pocillopora damicornis* were analyzed using separate principle  
149 components analysis. A threshold of 0.1 of relatedness across SNPs for each species was  
150 used to call clonal or highly similar genotypes. Most of the clones existed among  
151 *Pocillopora damicornis* with 20 colonies collapsing to 11 genotypes. In *Acropora*  
152 *gemmifera*, 20 colonies collapsed to 17 colonies. There were no identical parents in  
153 *Acropora hyacinthus*. The identification of unique genotypes allowed us to test the  
154 relative contributions of the host to bleaching and recovery during the bleaching event.  
155 VCF files will be available on the SRA.

156  
157 To determine the proportion of bleaching explained by host, origin, species, crate, and  
158 symbiont, we utilized the genotype identity to group replicates. To determine the  
159 correlation between bleaching severity in the nursery and in the native lagoons, we  
160 averaged bleaching severity across all clonal replicates. Finally, to determine effects of  
161 predation, bleaching severity, and host identity on survival, we used the genotype identity  
162 to group replicates.

### 163 164 **Determining biomarkers**

165 Biomarker SNPs were tested using RNA-Seq transcriptome data for *Acropora hyacinthus*  
166 and *Acropora gemmifera*. For *Acropora hyacinthus*, 14 transcriptome libraries were  
167 previously part of the characterization of biomarker environmental correlates of thermal  
168 tolerance (Bay & Palumbi 2014 [4], available through NCBI with BioProject accession  
169 PRJNA379450). The additional 3 transcriptomes for AH150, AH151, and AH152, and  
170 the 20 parent transcriptomes of *Acropora gemmifera* used for determining unique  
171 genotypes (previous section) were used for testing biomarkers. Each colony was treated  
172 independently (not aggregated into clonal group) since biomarkers may be tested blind of  
173 the underlying host genotype.

174  
175 For the 114 SNPs across 92 contigs established by Bay & Palumbi 2014 [4], libraries  
176 from *Acropora hyacinthus* and *Acropora gemmifera* were mapped directly onto the 92  
177 *Acropora hyacinthus* contigs with BowTie2 (-very-sensitive, bS<sub>q</sub> > 10). SNPs were  
178 called using FreeBayes (--use-best-n-alleles 3) and filtered with vcfFilter (-f "TYPE = snp  
179 & QUAL > 30" -g "GQ > 20"). In *Acropora hyacinthus*, for each library, we calculated  
180 the fraction of candidate loci (22 of 114 SNPs where all individuals were called at that  
181 loci) where the individual has at least one minor allele (comparable calculations for other  
182 *Acropora hyacinthus* individuals are located in supplementary table S2 of Bay & Palumbi  
183 2014 [4]). All new calculations were generated for *Acropora gemmifera* for the 23 of 114  
184 SNPs called in all 20 individuals. Minor Allele Frequencies are included in Dataset S3.

185  
 186 We then ranked parent colonies by species and then by their Minor Allele Frequencies.  
 187 We took the top half with the highest proportion of the minor allele (predicted resilient)  
 188 and compared a nursery constructed with best performers from the biomarker assay to a  
 189 nursery with best performers from our three proxies (Supplemental figure 5).

190  
 191 For the Jin et al. 2016 genotype [5], we mapped *Acropora hyacinthus* and *Acropora*  
 192 *gemmifera* directly onto the EZ013402.1 *Acropora millepora* sequence with BowTie2 (-  
 193 very-sensitive, bSq > 10). SNPs were called with FreeBayes and filtered with vcffilter (--  
 194 use-best-n-alleles 3 | -f "TYPE = snp & QUAL > 30" -g "GQ > 20"). The genotype was  
 195 called at position 1054 (biomarker C70S236 with probe 5'  
 196 G T A C T T T T A T G A C G c G C T A A A T G C A T G A C T T 3') [8]. Genotypes are included in  
 197 Dataset S3.

198

### 199 ***Determining symbiont genus***

200

201 Symbiont genus was characterized in three ways in this study: 1) gel-based identification  
 202 of the cp23s region for genus-level characterization of parent colonies across multiple  
 203 time-points, 2) mapping of transcriptome sequences to a ~260 bp region of the ITS2  
 204 marker for species characterization, and 3) *de novo* analysis of 579 SNPs across the entire  
 205 symbiont transcriptome for variant characterization within species.

206

207 Transcriptomes were generated for 17 *Acropora hyacinthus* colonies, 20 *Acropora*  
 208 *gemmifera* colonies, 20 *Pocillopora damicornis* colonies, and 3 *Porites cylindrica*  
 209 colonies. To map to the ITS2 region, 176 Genbank accessions of ITS2 were taken for  
 210 known symbiont species from Correa and Baker 2009 [9]. Sequences were downloaded,  
 211 aligned, and trimmed to an approximately ~260bp region across all subclades. Duplicate  
 212 sequences were removed and the first accession of a unique haplotypes as established by  
 213 Correa and Baker 2009 was used in the final FASTA. This left 107 sequences, 100  
 214 belonging to genus *Cladocopium* and 7 belonging to genus *Durusdinium*. Untrimmed and  
 215 unclipped FASTq libraries for each transcriptome were mapped with bowtie2 (-very-  
 216 sensitive) to these 107 ITS2 regions with an average of 290 reads mapping at least one  
 217 time across all libraries and 99% of reads mapping more than once (indicating non-  
 218 specific mapping to subclades). Reads were then filtered for mapping quality (-q 10)  
 219 leaving very few reads for each parent colony (average of 16 reads, median of 3 reads).  
 220 Across all libraries, 96% of reads were predominantly distributed in four symbiont  
 221 species (*Cladocopium* C3k, C1d, and C15 and *Durusdinium* D1 (= *trenchii*)). Of these,  
 222 *Cladocopium* C3k mapped only to symbionts in *Acropora* colonies (20 libraries  
 223 successfully mapped at least one read, all were *Acropora*), *Cladocopium* C1d mapped  
 224 predominantly to *Pocillopora* (7 libraries successfully mapped at least one read, 6 of  
 225 these were *Pocillopora*), *Cladocopium* C15 mapped to only *Porites* (5 libraries  
 226 successfully mapped at least one read, all were *Porites*), and D1 mapped to both  
 227 *Acropora* and *Pocillopora* (19 libraries successfully mapped at least one read, 9 were  
 228 *Pocillopora* and 10 were *Acropora*). These preliminary findings indicate that mapping  
 229 transcriptome libraries to the ITS2 region distinguishes species within genus  
 230 *Cladocopium*, but may not be as revealing for genus *Durusdinium* [10].

231

232 To further elucidate patterns of sub-clade differences in symbionts within and between  
233 species of coral, transcriptomes were mapped with bowtie2 (very-sensitive-local) to the  
234 *S. microadriaticum* [11] reference transcriptome on ReefGenomics.org. Symbiont  
235 transcripts in this study represent the entire population of symbionts in the homogenized  
236 tissue. As such, a Single Nucleotide Polymorphism or “SNP” defined in this analysis  
237 actually represents the population level polymorphism for a given colony. SNPs were  
238 called on high quality reads (-q 10) using FreeBayes (--genotype-qualities --use-best-n-  
239 alleles 3) and SNPs were filtered for high quality SNPs with a MAF of 0.05 ("TYPE =  
240 snp & QUAL > 30 & AF > 0.05 & AF < 0.95 & NUMALT = 1") called in all coral  
241 individuals. This left 579 SNPs called across all colonies. These 579 SNPs were then  
242 plotted in a Principal Component Analysis to determine clustering of groups of colonies  
243 based on their symbionts.

244

245 The first Principal Component axis (Supplemental Figure 6) explained 75.6% of the total  
246 variance and separated the colonies with predominately genus *Durusdinium* from  
247 predominately genus *Cladocopium* colonies with mixed populations in the center. The  
248 second Principal Component axis explained 5.1% of the variance and separated by coral  
249 genera for both the genus *Cladocopium* and genus *Durusdinium* symbionts. This  
250 indicates sub-clade specialization of symbiont type by genera in not only genus  
251 *Cladocopium* but additionally genus *Durusdinium* symbionts. The first two Principal  
252 Component axes were significantly correlated to the bleaching outcome in the common  
253 gardened nursery (the first axis Pearson's correlation of 0.57 and p-value of 2.4e-6, the  
254 second axis Pearson's correlation of 0.38 and p-value of 2.7e-3) though this was mostly  
255 representative of the correlation between symbiont genus (axis one) and coral genera  
256 (axis two). After the first two axes, none of the axes explaining more than 1% of the  
257 variance significantly correlated with bleaching outcome in the common gardened  
258 nursery.

259

260 We also tested symbiont type throughout the experiment using the cp23 marker and a gel-  
261 based assay to determine the relative proportions of symbiont genera. Baseline  
262 *Symbiodinium* types were used based on samples collected from parent colonies in  
263 August of 2014. Genomic DNA was extracted from skeleton fragments used in  
264 chlorophyll analysis for one replicate of each genotype. The 23s ribosome in the  
265 chloroplast (cp23s, 23S4F: 5'-GACGGCTGTAACCTATAACGG-3'; 23S7R: 5'-  
266 CCATCGTATTGAACCCAGC-3') was amplified for the two main genera of symbionts  
267 present in American Samoa. A 99 base pair insertion in the genus *Durusdinium* sequence  
268 allowed for gel-based classification symbionts. If bands for only genus *Cladocopium*  
269 were present, the fragment was categorized as C (1). If bands for only genus  
270 *Durusdinium* were present, the fragment was categorized as D (5). If both bands were  
271 present, the colony was characterized by C-dom (2), mixed (3), or D-dom (4) based on  
272 visual densitometry. Data are included in Dataset S1.

273

274 Symbiont type was calculated for all parent colonies at the start of the experiment.  
275 Symbiont type was also recorded for the parent colonies of *Pocillopora damicornis* and  
276 *Acropora gemmifera* in April of 2015, while corals were visually bleached. There was

277 insufficient sample of *Acropora hyacinthus* to record symbiont type for all individuals at  
278 that time point. Thus, symbiont type was recorded for parent colonies in August 2015.  
279 Parent colonies were considered ‘switchers’ if they moved two or more categories (i.e.  
280 from C to mixed or from D-dom to C-dom) between the baseline time point and the time  
281 point after warming stress.

282

283 Because we had symbiont type characterized by the gel assay and transcriptomes for  
284 colonies at a given time point, we were able to validate gel-based genus-level symbiont  
285 classifications with transcriptome data. For *Acropora gemmifera*, we had all twenty  
286 transcriptomes collected during April of 2015. From separate samples collected in the  
287 same field season, we characterized the cp23s gel-based genus-level symbiont  
288 classifications. We took the untrimmed and unclipped *Acropora gemmifera* libraries and  
289 mapped them with bowtie2 (--very-sensitive) to two ITS2 regions and the cp23s region  
290 for genus C and genus D (fasta included in supplement). We took high-quality mapped  
291 reads (-q 10) and then averaged the portion of mapping to genus D across the three  
292 markers. We correlated the portion of genus D with the numeric classification (1 as C, 2  
293 as C-dom, 3 as mixed, 4 as D-dom, 5 as D) from the gel assay. The resulting correlation  
294 (Supplementary Figure 7) shows a highly significant 0.98 correlation ( $p = 7.7e-15$ ). This  
295 finding demonstrates that the transcriptome symbiont classification and gel-based  
296 classifications are highly correlated.

297

### 298 ***Calculating maximum bleaching in the nursery***

299 From weekly photos of the transplants, we were able to assess the severity of bleaching  
300 through visual categorization of each nubbin into eight classes: 100% pigmented, 80%  
301 pigmented, 60% pigmented, 40% pigmented, 20% pigmented, 0% pigmented, dead, or  
302 not evaluated. Categories represent average bleaching integrated across the entire colony.  
303 In 2015, eleven time points spanning 200 days were included in this analysis to cover the  
304 extent of the bleaching event. For each crate at each time point, each nubbin was  
305 evaluated blind of its location. This analysis was repeated three times. Across the  
306 triplicate assessment, the median category was chosen for each time point (bleaching  
307 scores for a single nubbin never ranged more than three bleaching categories). A final  
308 ‘maximum’ score was calculated for each nubbin across the 11 time points, representing  
309 the most severe bleaching observed, prior to mortality if mortality occurred. Data are  
310 included in Dataset S2.

311

312 For the 2017 bleaching event, one set of photographs was collected on March 8, 2017 by  
313 collaborators at the Department of Marine and Wildlife Resources. Nubbins were scored  
314 for bleaching severity three independent times and the median category was chosen for  
315 each nubbin (bleaching scores for a single nubbin never ranged more than two bleaching  
316 categories). Since we did not have a time series, we compared the 2015 event by  
317 selecting a single time point from the eleven recorded assessments across the 200 days of  
318 bleaching in 2015. We calculated average bleaching scores for each species at each time  
319 point and selected the time point with the most similar bleaching profile (May 9, 2015).  
320 Data for bleaching on May 9, 2015 and March 8, 2017 are included in Dataset S1.

321

### 322 ***Calculating bleaching scores for parent colonies***

323 During the April 2015 field season, photographs and field visual bleaching data were  
 324 collected. The same classifications of bleaching used in the nursery were used for the  
 325 parent colonies. Visual bleaching was a consensus between two independent observations  
 326 of bleaching severity and was integrated across an entire colony head. Data are included  
 327 in Dataset 1.

328

### 329 ***Calculating survival***

330 Survival was evaluated as the final binary state of the 800 nubbins after the one-year  
 331 project – alive or dead (no live tissue, algae covered). Dead nubbins were categorized  
 332 into dead or dead after bleaching where the latter was observed to have a lowest bleached  
 333 score of 40% or greater prior to its death. Data are included in Dataset S2.

334

### 335 ***Calculating growth***

336 Nubbin size was roughly standardized to  $3.8 \pm 0.5$ g in buoyant weight including epoxy and  
 337 bolt. To account for variability in starting weight, we scaled all subsequent measures to  
 338 starting weight. Baseline weight was measured in August of 2014. Additional weight was  
 339 measured in December of 2014, April of 2015, and August of 2015. A pre-bleaching  
 340 growth period was calculated using the difference in scaled weight between December  
 341 2014 and August 2014 (5 months). A post-bleaching growth period was calculated using  
 342 the difference in scaled weight between August 2015 and April 2015 (5 months).  
 343 Fragments from DA03 were removed from growth analysis due to its outlier growth  
 344 effects.

345

### 346 ***Comparing bleaching temperatures in Sili to average temperatures in the HVP and the*** 347 ***MVP***

348

349 The National Park Service provided data for temperature from 1999-2015. Temperature  
 350 loggers recorded by the National Park Service were constitutively  $0.33 \pm 0.14$ °C lower  
 351 than average temperature recorded by our loggers in the same lagoons for the same  
 352 period (12,239 points for the HVP and the MVP recorded every half hour over eight and  
 353 a half months). This constitutive difference is likely due to differences in temperature  
 354 sensors. Temperatures in Sili were shifted  $0.33$ °C to be comparable to long term Park  
 355 data.

356

357 Supplemental material references

- 358 1. Ladner, J.T. and S.R. Palumbi, *Extensive sympatry, cryptic diversity and*  
 359 *introgression throughout the geographic distribution of two coral species*  
 360 *complexes*. *Molecular ecology*, 2012. **21**: p. 2224-38.
- 361 2. Craig, P., C. Birkeland, and S. Belliveau, *High temperatures tolerated by a*  
 362 *diverse assemblage of shallow-water corals in American Samoa*. *Coral Reefs*,  
 363 2001. **20**(2): p. 185-189.
- 364 3. Baker, A.C., et al., *Corals' adaptive response to climate change*. *Nature*, 2004.  
 365 **430**: p. 2004.
- 366 4. Bay, R.A. and S.R. Palumbi, *Multilocus adaptation associated with heat*  
 367 *resistance in reef-building corals*. *Current Biology*, 2014. **24**: p. 2952-2956.



- 368 5. Jin, Y.K., et al., *Genetic markers for antioxidant capacity in a reef-building coral*.  
369 Science Advances, 2016. **2**(5).
- 370 4. Ritchie, R., *Universal chlorophyll equations for estimating chlorophylls a, b, c,*  
371 *and d and total chlorophylls in natural assemblages of photosynthetic organisms*  
372 *using acetone, methanol, or ethanol solvents*. Photosynthetica, 2008. **46**: p. 115-  
373 126.
- 374 5. Holmes, G., et al., *Using three-dimensional surface area to compare the growth*  
375 *of two Pocilloporid coral species*. Marine Biology, 2008. **155**(4): p. 421-427.
- 376 6. Wang, S., et al., *Construction of a high-resolution genetic linkage map and*  
377 *comparative genome analysis for the reef-building coral Acropora millepora*.  
378 Genome Biology, 2009. **10**.
- 379 7. Correa, A.M.S. and A.C. Baker, *Understanding diversity in coral-algal*  
380 *symbiosis: a cluster-based approach to interpreting fine-scale genetic variation in*  
381 *the genus Symbiodinium*. Coral Reefs, 2009. **28**(1): p. 81-93.
- 382 8. LaJeunesse, T.C., et al., *Long-standing environmental conditions, geographic*  
383 *isolation and host-symbiont specificity influence the relative ecological*  
384 *dominance and genetic diversification of coral endosymbionts in the genus*  
385 *Symbiodinium*. Journal of Biogeography, 2010. **37**(5).
- 386 9. Aranda, M., et al., *Genomes of coral dinoflagellate symbionts highlight*  
387 *evolutionary adaptations conducive to symbiotic lifestyle*. Scientific Reports,  
388 2016. **6**(39734).

389

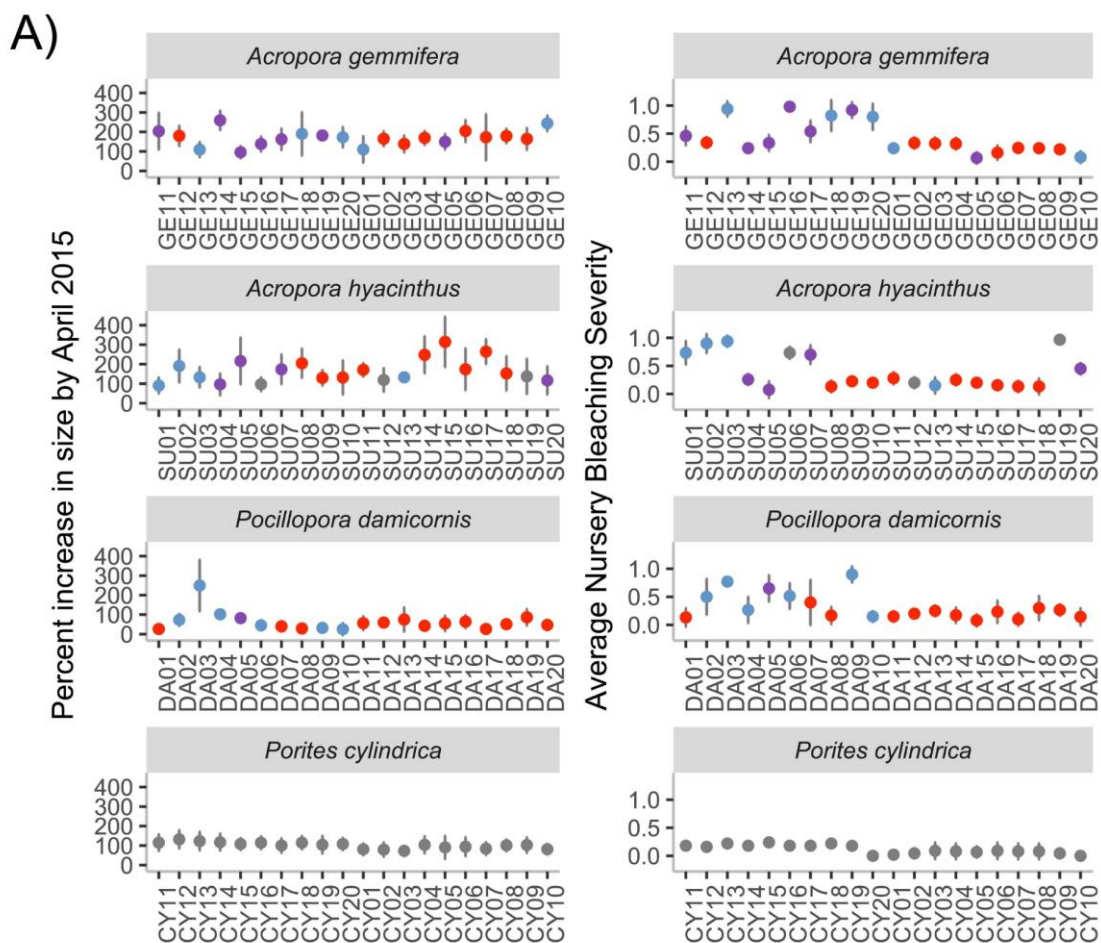

390

391

392

393

394

395

396

397

398

399

**Supplemental Figure 1A** | Growth and bleaching (with error bars for 10 replicate nubbins) in April 2015 for all 20 parental colonies of four species. The left 10 parents on all plots are from the MVP, the 10 right from the HVP. Color denotes whether the parents had symbiont genus *Cladocopium* (“C”, blue), genus *Durusdinium* (“D”, red) or switched symbionts during the course of the experiment.

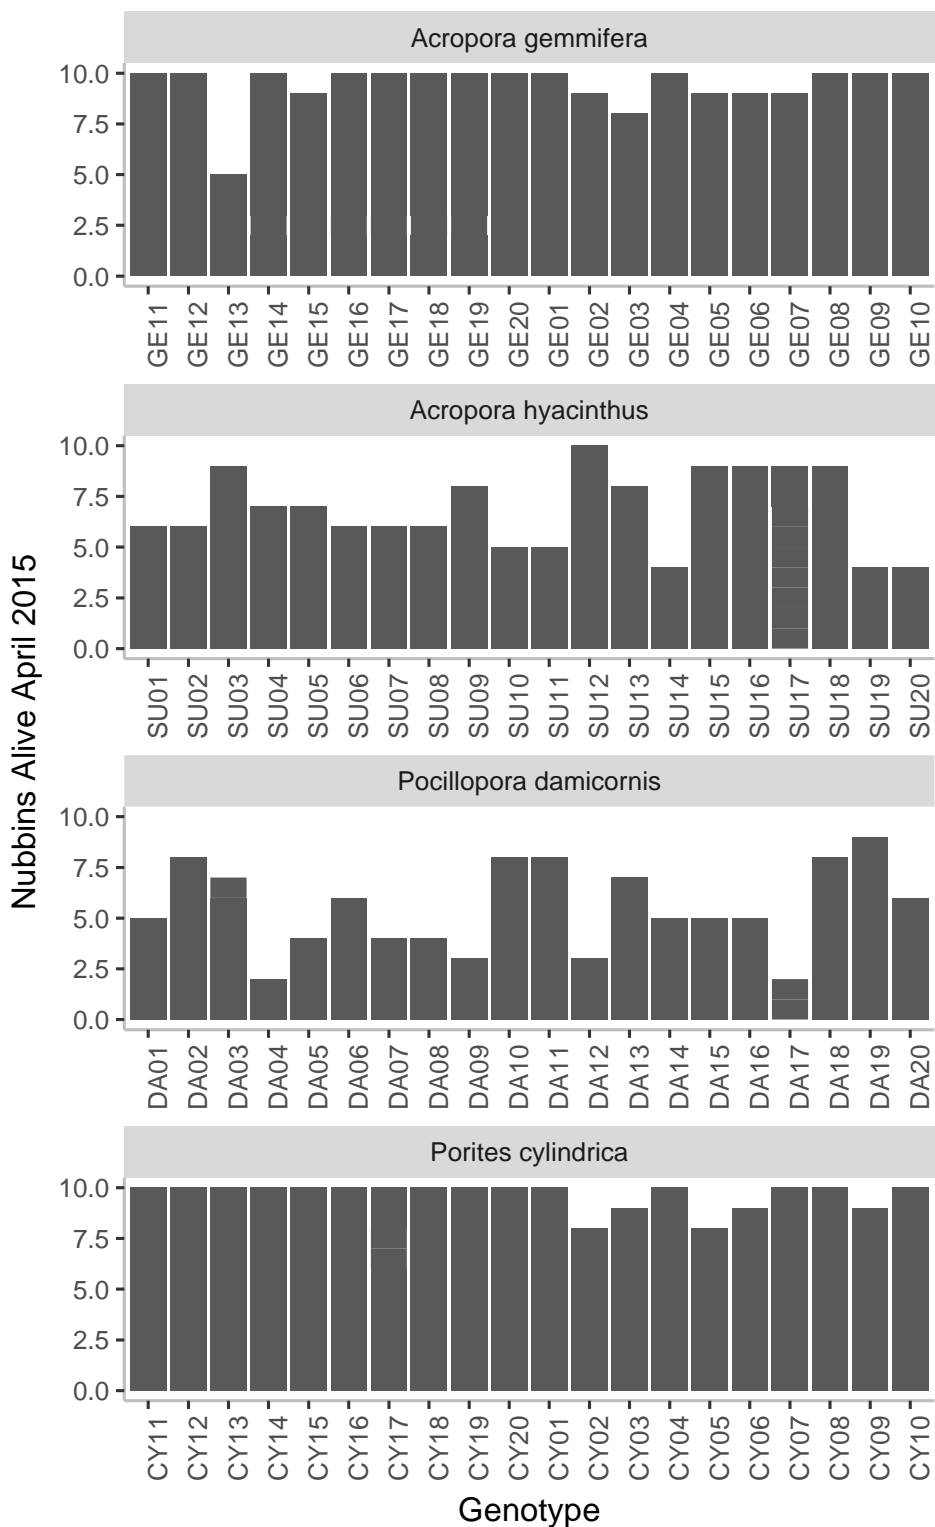

400 **Supplemental Figure 1B)** Survival from the period of August 2014 to April 2015 (when  
 401 bleaching began) of replicate nursery nubbins for each parent colony. Survival was  
 402 variable across species and was most affected by species specific predation in  
 403 *Pocillopora damicornis* and *Acropora hyacinthus*.

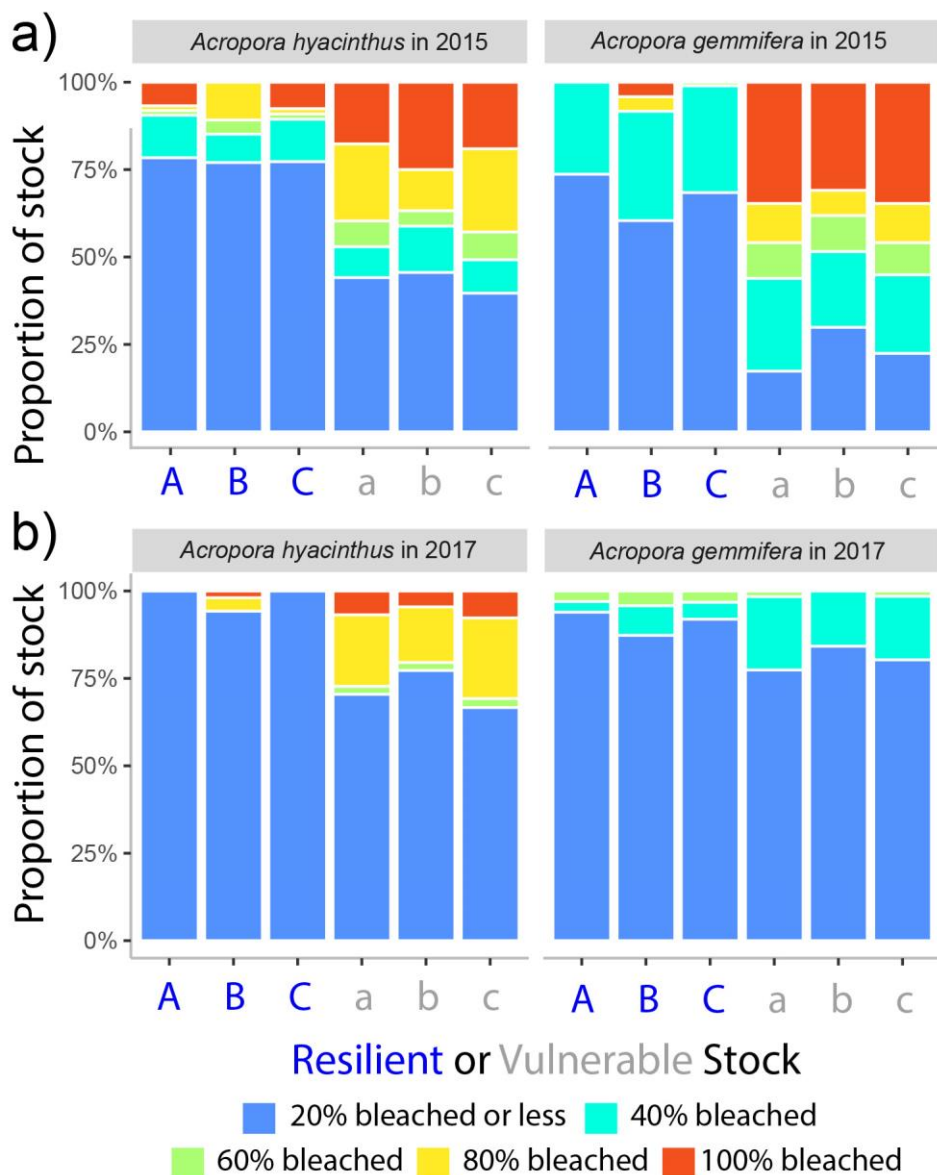

404

405

406 **Supplemental Figure 2** | This plot shows the bleaching seen in the nursery by stock type

407 in the a) 2015 and b) 2017 bleaching events in American Samoa. In both seasons, the

408 predicted resilient (A-C) stocks bleached less than the predicted vulnerable (a-c) stocks.

409 The visual bleaching scores in 2015 correspond to May 9, 2015 and the visual bleaching

410 scores in 2017 correspond to March 8, 2017. The two dates were selected to demonstrate

411 comparable severities in bleaching across the two events. In the 2015 bleaching event,

412 both *Acropora hyacinthus* and *Acropora gemmifera* bleached in the vulnerable stock (a-

413 c) to similar extents. However, in 2017, bleaching was less severe for *Acropora*

414

415 Categories of stock type are as follows: Predicted resilient: A) Corals from the HVP B)

416 Top experimental stress performers C) Hottest extreme microclimates

417 Predicted vulnerable: a) Corals from the MVP b) Bottom experimental stress performers

418 c) Coolest extreme microclimates

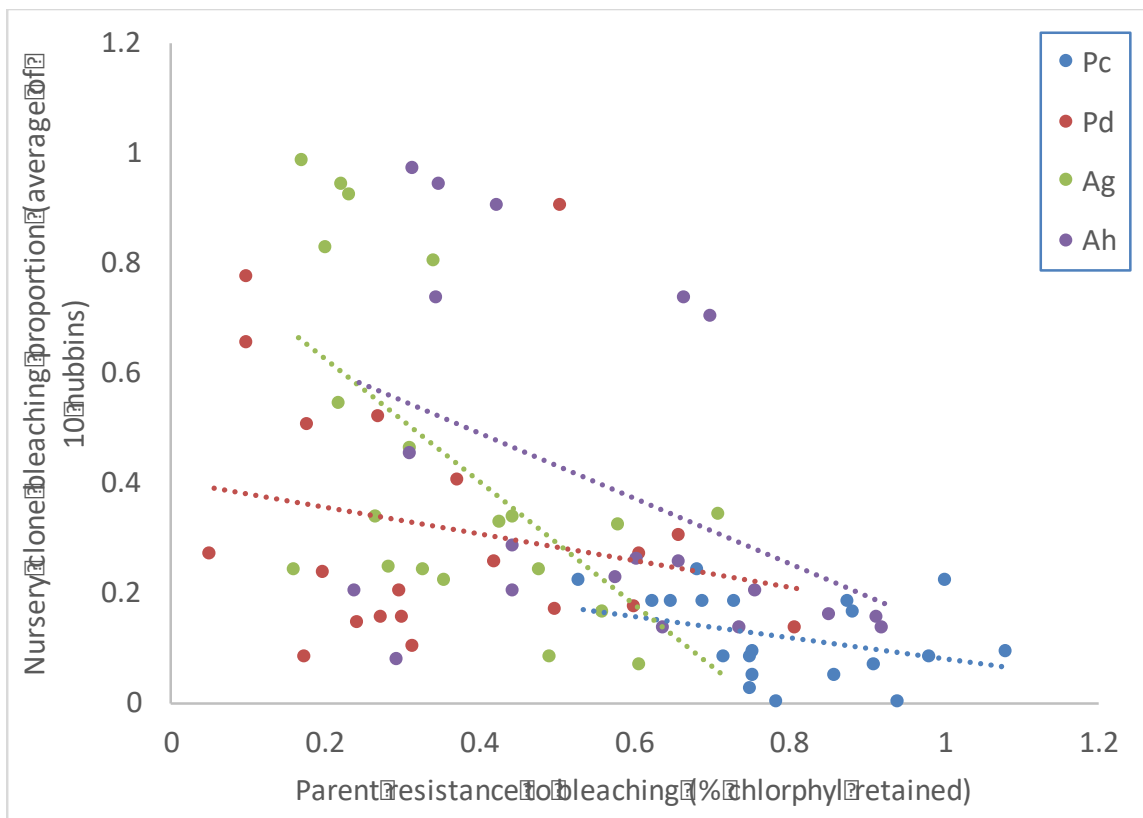

419  
 420  
 421  
 422  
 423  
 424  
 425  
 426  
 427

**Supplemental Figure 3** | Negative relationship between the resistance of a coral colony of four species to bleaching and the bleaching observed across 10 nubbins from that colony during the April 2015 bleaching event, eight months after transplantation. Dotted lines represent linear regressions for each species.

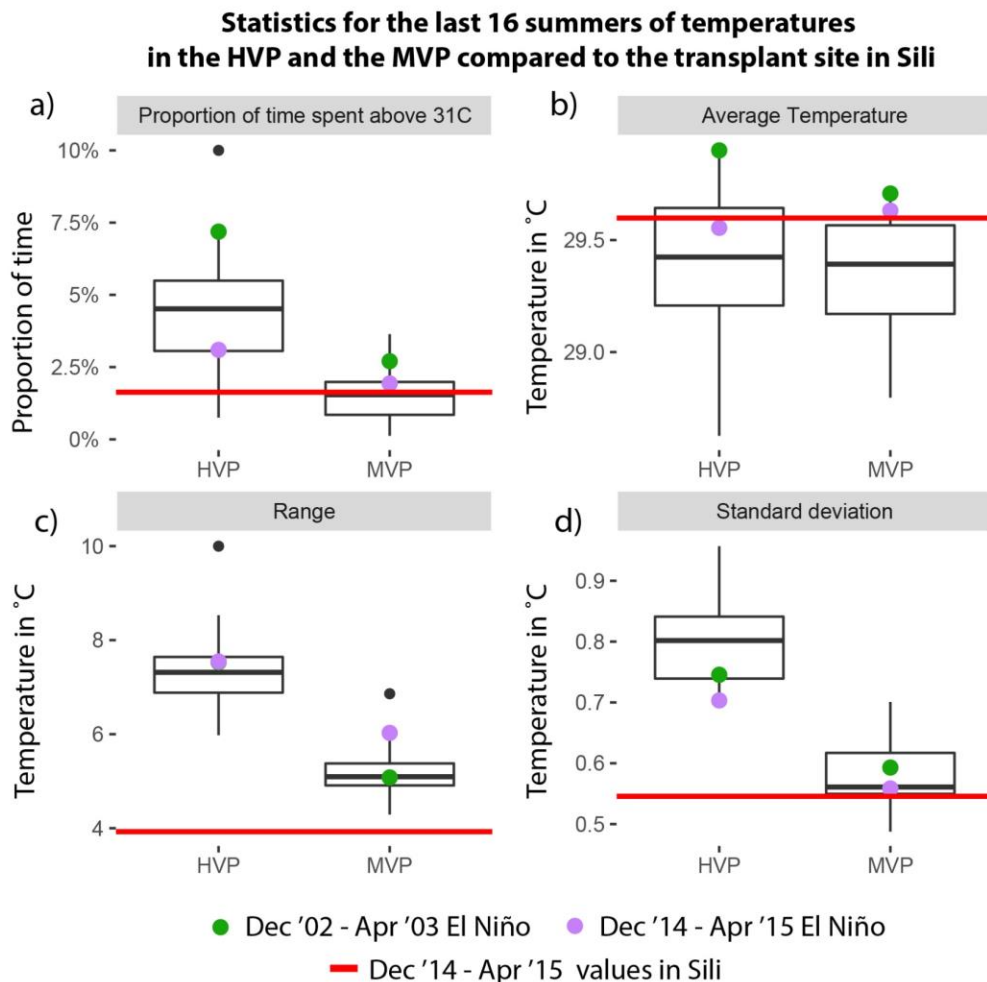

428  
429  
430  
431  
432  
433  
434  
435  
436  
437  
438  
439  
440  
441  
442  
443  
444  
445  
446  
447

**Supplemental Figure 4** | The graphs depict boxplot distributions of a) proportion of time spent above 31°C b) the average temperature c) the range in temperature and d) the standard deviation in temperature for the last 16 summers (December to April in the years from 1999-2015) in the HVP and the MVP. The red line depicts the value experienced at the transplant site Sili for the 2014-2015 El Niño. The green dot depicts the values for the 2002-2003 El Niño and the purple dot depicts the same 2014-2015 El Niño in the parks.

Plots indicate that conditions in Sili reached extreme temperatures less frequently (a) and were less environmentally variable (c & d) than conditions in either the HVP or the MVP over the past 16 years. Yet replicate nubbins in Sili bleached on average 11% more severely than parent colonies did in their home environments. It is possible that in the nursery, other environmental factors or fragment size of nubbins contributed to an increase in the overall bleaching of nubbins. Yet it is also possible that de-acclimatization occurred over the eight-month period prior to the bleaching event. Either way, non-resilient nursery nubbins still bleached, indicating selecting resilient stock may be more important than selecting a nursery site that experiences temperatures that are less extreme.

448

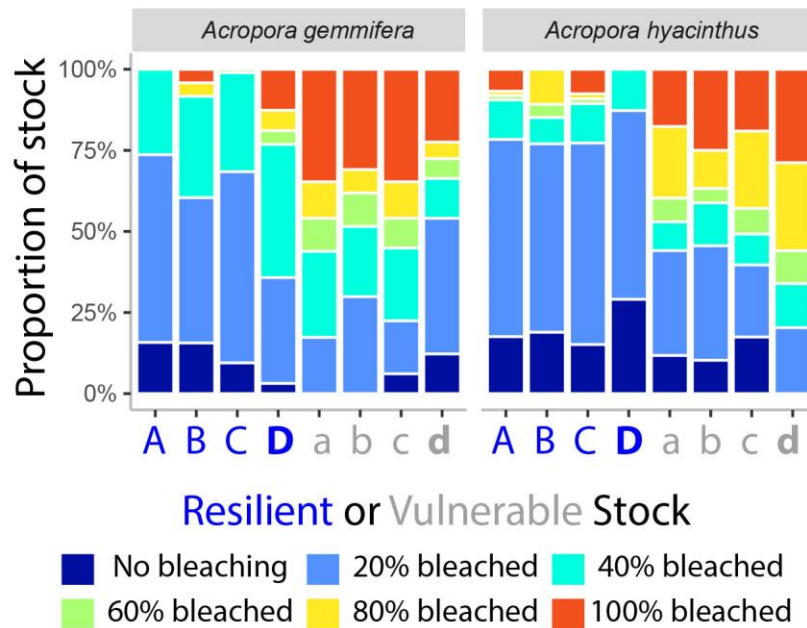

449

450

451

452

453

454

455

456

457

458

459

460

461

462

463

464

465

466

467

468

**Supplemental Figure 5** | This plot compares the efficacy of the three simple proxies (categories A-C and a-c) to multi-locus biomarkers (category D and d) when partitioning the nursery by stock type. It shows the severity of visual bleaching seen by the stock throughout the 2015 bleaching event. The SNPs, established in *Acropora hyacinthus*, perform best at producing a resilient stock. However, in the closely related congener *Acropora gemmifera*, the same set of SNPs created a nursery that bleached more (D) than a nursery created with simple proxies (A-C).

Categories of stock type are as follows:

Predicted resilient: A) Corals from the HVP B) Top experimental stress performers C) Hottest extreme microclimates D) Individuals with the highest proportion of the minor alleles for Bay & Palumbi 2014 [4] SNPs

Predicted vulnerable: a) Corals from the MVP b) Bottom experimental stress performers c) Coolest extreme microclimates d) Individuals with the lowest highest proportion of the minor allele across Bay & Palumbi 2014 [4] SNPs

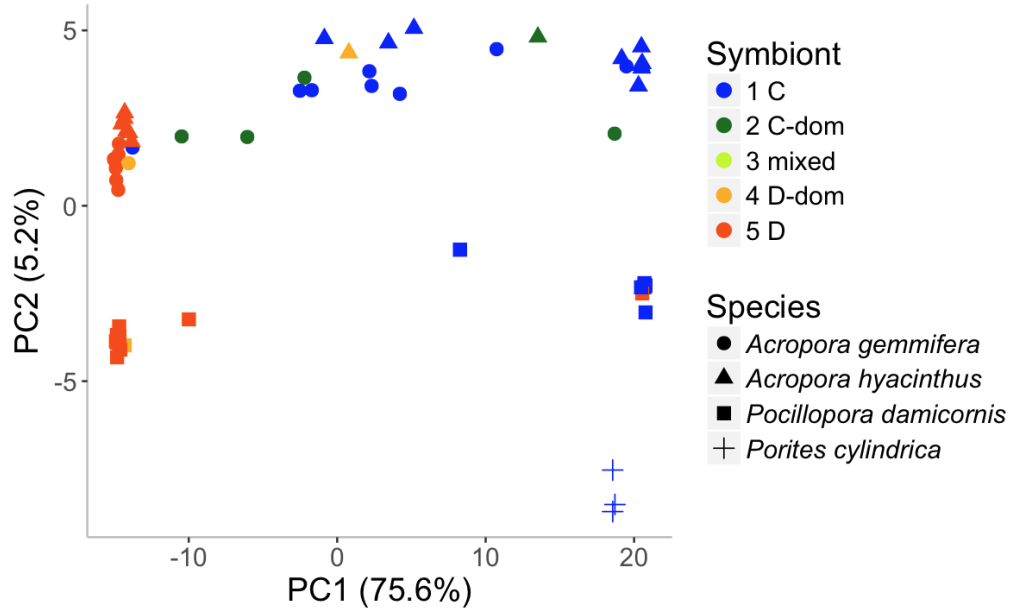

469  
470  
471

472 **Supplemental Figure 6** | Plot of the first and second Principal Components of the 579  
473 SNPs in the symbiont populations for the 30 parent colonies whose transcriptomes were  
474 generated. The first Principal Component corresponds to the differentiation between  
475 predominately genus *Cladocopium* and genus *Durusdinium* symbiont populations. The  
476 second Principal Component corresponds to differences between genera of coral. The  
477 second Principal Component shows genera specialization not only in genus *Cladocopium*  
478 symbionts (cooler colors) but also genus *Durusdinium* symbionts (warmer colors).



*Acropora gemmifera* symbiont types in April 2015 classified  
by two methods (transcriptome and cp23s gel-type)

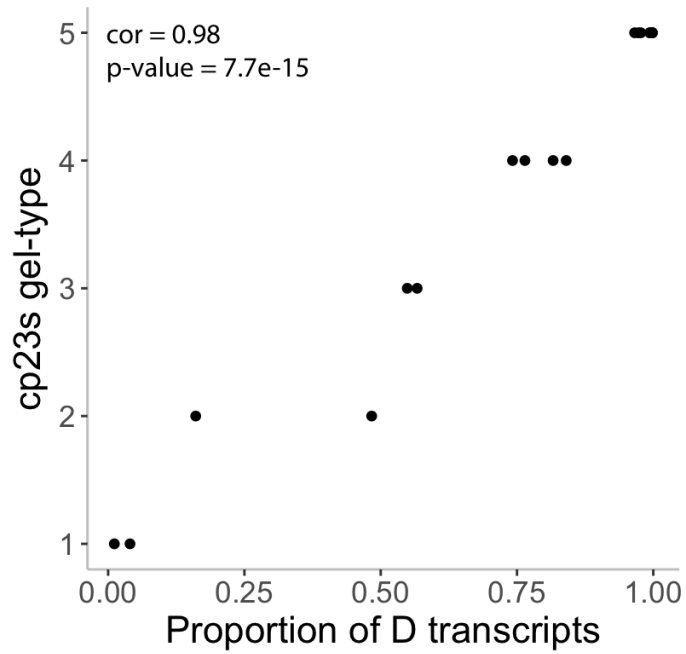

479  
480  
481  
482  
483  
484  
485  
486  
487  
488

**Supplemental Figure 7** | Classification of symbiont type (D = *Durusdinium*) in *Acropora gemmifera* parent colonies in April of 2015 through two different methods: mapping transcriptomes (x-axis), and gel-based assay (y-axis). The high correlation between the two methods implies strong correlation between gel-based calls and proportions of symbionts classified through symbiont data.

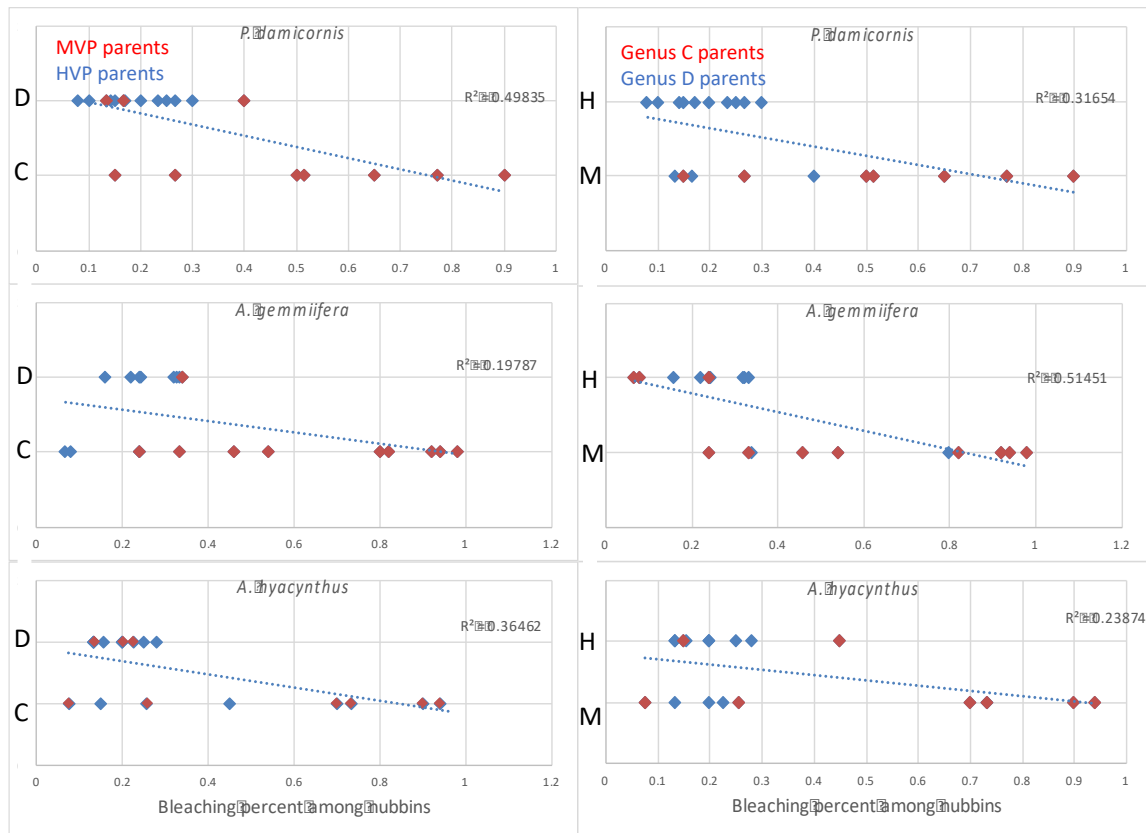

489  
490  
491  
492  
493  
494  
495  
496  
497  
498  
499  
500  
501  
502  
503  
504  
505  
506  
507  
508  
509  
510  
511  
512  
513

**Supplemental Figure 8:** Relationship between average nubbin bleaching among nursery replicates at Sili Reef to symbiont genus (*Cladocopium* vs. *Durisdinium*, left) and location of origin (right) for the parental colonies. Both symbiont genus and location correlate with bleaching in all three species. However, symbiont genus and location are tightly associated, shown by color coding in each figure, making it unclear which factor controls bleaching rate. For example, colonies with *Cladocopium* symbionts (Genus C) are nearly all found in the MV pool (22 out of 26) whereas the HV pool houses mostly genus *Durisdinium* symbionts (19 of 24). These figures also show the larger range of bleaching results for corals from the MV pool or those with genus *Cladocopium* symbionts. GLM and MLR results show both origin and symbiont type separately are associated with bleaching (see results).

**Supplemental Table 1:** To test the relationship between bleaching of the nubbins at Sili and the species, origin and symbiont of individual clones, we ran General Linear Models

514 (using R), with species, origin, and symbiont as binomial variables explaining whether  
 515 bleaching at Sili was >25%. All three parameters together significantly explained  
 516 bleaching (P=0.0009), with individual coefficient Origin (p=0.03) being significant, and  
 517 Symbiont marginally so (p=0.08).

518

519 Coefficients:

|                         | Estimate | Std. Error | z value | Pr(> z ) |
|-------------------------|----------|------------|---------|----------|
| 520 (Intercept)         | 1.0935   | 1.5285     | 0.715   | 0.4743   |
| 521 Species: gemmifera  | 0.4727   | 0.7959     | 0.594   | 0.5526   |
| 522 Species: hyacinthus | -0.4348  | 0.7961     | -0.546  | 0.5850   |
| 523 Origin: MVP         | 1.5287   | 0.7248     | 2.109   | 0.0349 * |
| 524 Symbiont            | -1.2750  | 0.7236     | -1.762  | 0.0781 . |

525 ---

526 Signif. codes: 0 '\*\*\*' 0.001 '\*\*' 0.01 '\*' 0.05 '.' 0.1 ' ' 1

527

528

529

530

531

532 **Supplemental Table 2:** The same results are obtained from a multiple linear regression  
 533 of Species, Origin, and Symbiont on the fraction of bleaching at Sili. Origin is again  
 534 highly significant, but in this analysis, Symbiont is also significant, with a Beta co-  
 535 efficient that is similar to that for Origin

536

537 Here, the multiple r-squared is 0.4343, adjusted R-squared 0.3908. p=0.000005.

538 Accounting for Origin and Symbiont, Species is not significantly associated with

539 bleaching in either model.

540

541 Coefficients:

|                        | Estimate  | Std. Error | t value | Pr(> t )     |
|------------------------|-----------|------------|---------|--------------|
| 542 (Intercept)        | 0.531427  | 0.149604   | 3.552   | 0.000822 *** |
| 543 Species:gemmifera  | 0.065472  | 0.069522   | 0.942   | 0.350673     |
| 544 Species:hyacinthus | 0.001947  | 0.070485   | 0.028   | 0.978070     |
| 545 Origin:MVP         | 0.197792  | 0.070005   | 2.825   | 0.006683 **  |
| 546 Symbiont           | -0.189711 | 0.071660   | -2.647  | 0.010712 *   |

547 ---

548 Signif. codes: 0 '\*\*\*' 0.001 '\*\*' 0.01 '\*' 0.05 '.' 0.1 ' ' 1

549

550 Residual standard error: 0.2124 on 52 degrees of freedom

551 Multiple R-squared: 0.4343, Adjusted R-squared: 0.3908

552 F-statistic: 9.981 on 4 and 52 DF, p-value: 4.535e-06

553

554 **Dataset S1 – Physical, growth, symbiont, bleaching and location data for the 80**  
 555 **colonies and the nubbins derived from them used in this study.**

556

557

558

559 **Dataset S2 – Bleaching, growth and mortality data for the 800 nubbins from 80**  
 560 **colonies followed in this study.**

561

562

563 **Dataset S3 – Genetic biomarkers for bleaching for the 80 colonies used in this study.**

564

565

566

**567 Acknowledgements**

568 Stanford University and NPSA & DMWR partners in Samoa. C. Caruso for technical &  
569 moral support in Samoa and help with project development. A. Lawrence for 2017  
570 bleaching survey. J. Lee for engineering brilliance and tank design. E. Lopez, C. Payne,  
571 N. Rose, N. Teixido Ullod, and P. Shum for helpful comments. J. Sua, R. Misa'alefua,  
572 A. Ayer, A. Mesher, S. Xu, Z. Gold, C Krediet, J. Mason, R. Bay, I. Jones, J. Hafer, G.  
573 Hill, E. Lopez, E. Sheets, L. Thomas, M. Sudek & T. Cameron for field support. The  
574 work was supported by NOAA Coral Reef Conservation Program, NSFGRFP, and the  
575 Gordon & Betty Moore Foundation.

576

577

**578 Author Contributions**

579 M.K.M. conceived the study with S.R.P. M.K.M. led field collection and analyses.

580 M.K.M. and S.R.P. wrote the paper.

581
